# Supplementary material
Source: PubMed Central journal article supplement (PMC7306449)
Supplement: 11427_2020_1718_MOESM1_ESM.pdf [file 11427_2020_1718_MOESM1_ESM.pdf]

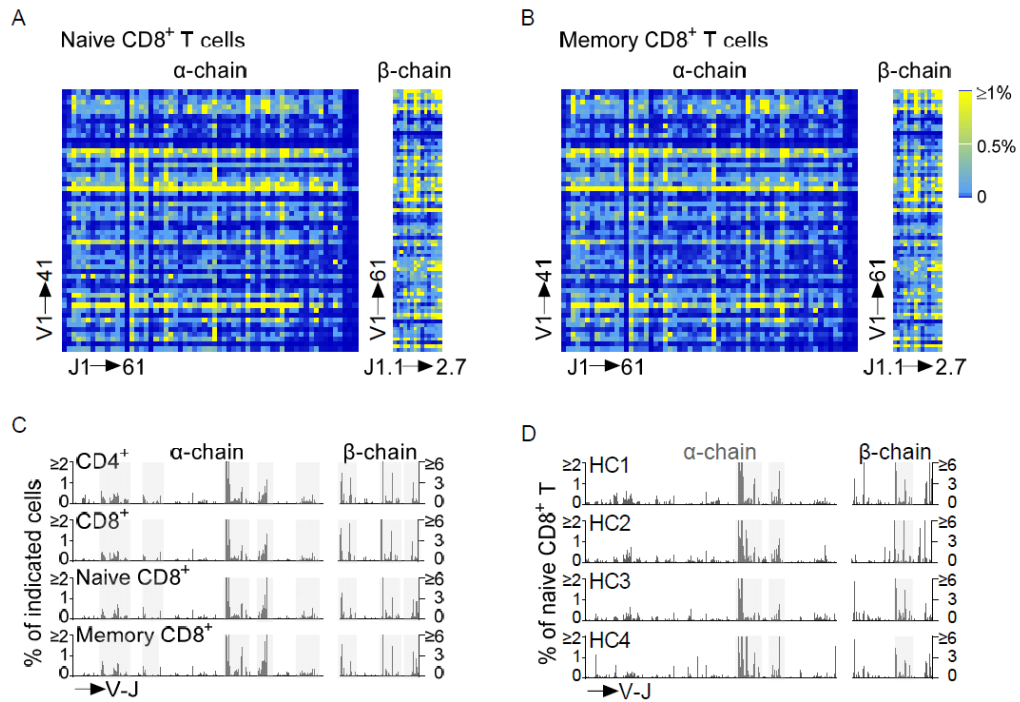

**Figure S1 The preference of TCR V-J pairing in CD8<sup>+</sup> T cells of healthy donors.**

**(A & B)** Heat maps of TCR  $\alpha$ - $\beta$  V-J pairs in naïve **(A)** and memory **(B)** CD8<sup>+</sup> T cells.

The percentages of V-J pairs were calculated as medians. Colour density indicates the relative expression level, from 0 to over 0.1%.

**(C)** Similar distribution of V-J pairing profiles presented in CD8<sup>+</sup> T cell subsets. The grey bar indicates the median frequency of V-J pairing in  $\alpha$ - and  $\beta$ -chains from different CD8<sup>+</sup> T cell subsets.

**(D)** Distributions of V-J pairing frequency of naïve CD8<sup>+</sup> T cell subsets in four representative individuals.

The V-J pairs with similar percentage distributions among different T cell subsets **(C)** or different individuals **(D)** are highlighted in grey.

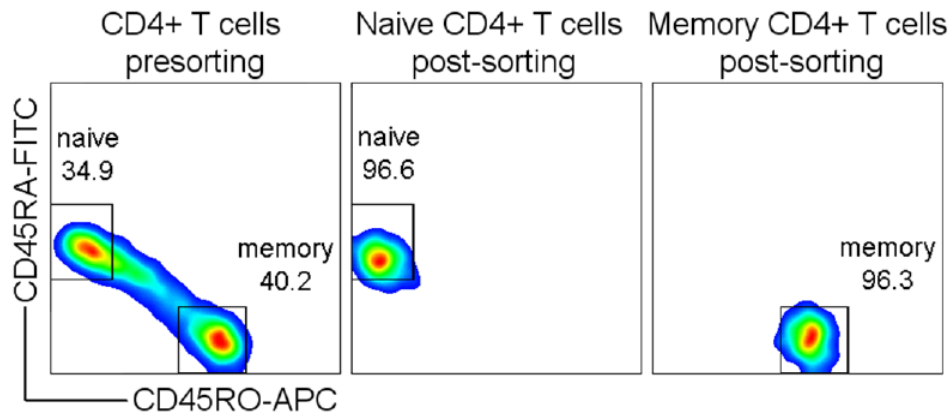

**Figure S2 The purity of sorted Naïve and memory CD4+ T cells of one the healthy donor by flow cytometry before and after sorting.**

The subsets of unsorted CD4<sup>+</sup> T cells (left), the purity of post-sorting naïve (middle) and memory (right) CD4<sup>+</sup> T cells from one healthy donor is shown by FACS graph.
