# Supplementary material
Source: PubMed Central journal article supplement (PMC7306449)
Supplement: 11427_2020_1718_MOESM2_ESM.pdf [file 11427_2020_1718_MOESM2_ESM.pdf]

1 **Table S1 Summary in sequencing data of TCR V-J pairs (Median, range)**

| $\alpha/\beta$ | Subset | Group | raw reads pairs<br>( $\times 10^5$ ) | V-J reads<br>( $\times 10^5$ ) | types count of<br>V-J pairs |
|----------------|--------|-------|--------------------------------------|--------------------------------|-----------------------------|
| $\alpha$       | na ĩve | HC    | 1.30(0.71-7.56)                      | 1.26(0.66-7.66)                | 2899(2372-3253)             |
|                |        | HN    | 1.83(0.68-8.06)                      | 1.79(0.66-8.02)                | 2562(1568-3210)             |
|                |        | HE    | 1.10(0.55-1.57)                      | 1.18(0.53-10.48)               | 2891(2290-3231)             |
|                | memory | HC    | 1.16(0.54-7.94)                      | 1.10(0.51-7.93)                | 2960(2189-2960)             |
|                |        | HN    | 1.80(0.70-5.11)                      | 1.81(0.65-5.10)                | 2891(1703-3229)             |
|                |        | HE    | 1.29(0.38-2.16)                      | 1.36(0.36-8.13)                | 2855(2234-3195)             |
| $\beta$        | na ĩve | HC    | 0.75(0.65-4.94)                      | 0.75(0.71-4.91)                | 1032(860-1045)              |
|                |        | HN    | 1.14(0.47-2.07)                      | 1.12(0.47-7.20)                | 976(881-1037)               |
|                |        | HE    | 0.71(0.21-1.68)                      | 0.76(0.21-1.58)                | 1008(949-1044)              |
|                | memory | HC    | 0.70(0.37-5.06)                      | 0.65(0.21-5.03)                | 1028(882-1044)              |
|                |        | HN    | 1.25(0.36-3.15)                      | 1.24(0.26-3.53)                | 998(849-1050)               |
|                |        | HE    | 0.72(0.23-1.88)                      | 0.62(0.22-1.75)                | 1008(959-1047)              |

- 2 Abbreviations: HC: healthy control; HN: HIV-infected HAART-na ĩve; HE: HIV-infected  
3 ART-experienced.  
4 The P values are calculated upon Mann-Whitney test compared with ART-na ĩve patients.

5 **Table S2 The consistency of Top 10 V-J pairs between Naïve and Memory CD4<sup>+</sup> T cell in Healthy**  
 6 **Control**

| Chain ( $\alpha/\beta$ ) | V-J                  | Naïve CD4 <sup>+</sup> |      | Memory CD4 <sup>+</sup> |      |
|--------------------------|----------------------|------------------------|------|-------------------------|------|
|                          |                      | Rank                   | %    | Rank                    | %    |
| $\alpha$                 | TRAV23/DV6-TRAJ3     | 1                      | 3.12 | 1                       | 4.45 |
|                          | TRAV23/DV6-TRAJ46    | 2                      | 2.96 | 2                       | 2.84 |
|                          | TRAV23/DV6-TRAJ39    | 3                      | 2.75 | 4                       | 2.00 |
|                          | TRAV23/DV6-TRAJ42    | 4                      | 2.57 | 3                       | 2.50 |
|                          | TRAV23/DV6-TRAJ10    | 5                      | 1.46 | 5                       | 1.46 |
|                          | TRAV23/DV6-TRAJ6     | 6                      | 1.05 | 7                       | 0.58 |
|                          | TRAV30-TRAJ46        | 7                      | 0.57 | 6                       | 0.69 |
|                          | TRAV30-TRAJ32        | 8                      | 0.50 | 9                       | 0.40 |
|                          | TRAV23/DV6-TRAJ57    | 9                      | 0.48 | 13                      | 0.34 |
|                          | TRAV23/DV6-TRAJ23    | 10                     | 0.46 | 11                      | 0.38 |
| $\beta$                  | TRBV11.3-TRBJ2.7     | 1                      | 4.77 | 2                       | 4.12 |
|                          | TRBV11.3-TRBJ2.1     | 2                      | 4.70 | 1                       | 6.34 |
|                          | TRBV2-TRBJ2.7        | 3                      | 2.50 | 4                       | 2.56 |
|                          | TRBV11.3-TRBJ1.4     | 4                      | 2.38 | 3                       | 3.58 |
|                          | TRBV16-TRBJ2.1       | 5                      | 2.05 | 5                       | 2.44 |
|                          | TRBV2-TRBJ2.1        | 6                      | 2.04 | 7                       | 1.86 |
|                          | TRBVB-TRBJ1.4        | 7                      | 1.89 | 6                       | 2.02 |
|                          | TRBV29/OR9.2-TRBJ2.1 | 8                      | 1.73 | 13                      | 0.96 |
|                          | TRBV29.1-TRBJ2.1     | 9                      | 1.70 | 10                      | 1.28 |
|                          | TRBV16-TRBJ2.7       | 10                     | 1.38 | 8                       | 1.39 |

7 The percentages are provided as medians.

8 **Table S3 Characteristics of V $\alpha$  segment of V-J pairs (ART-experienced HIV-infected patients vs.**  
 9 **healthy controls,  $p < 0.01$ )**

| Naïve CD4 <sup>+</sup> |           |            |           |                | Memory CD4 <sup>+</sup> |           |            |           |                |
|------------------------|-----------|------------|-----------|----------------|-------------------------|-----------|------------|-----------|----------------|
| V $\alpha$             | Rank (HC) | % (HC)     | #         | % <sup>a</sup> | V $\alpha$              | Rank (HC) | % (HC)     | #         | % <sup>a</sup> |
| TRAV23/DV6             | 1         | 34.5       | 10        | 18.5           | TRAV23/DV6              | 1         | 28.8       | 1         | 1.9            |
| <b>TRAV8.2</b>         | <b>2</b>  | <b>7.5</b> | <b>31</b> | <b>57.4</b>    | <b>TRAV8.2</b>          | <b>2</b>  | <b>9.9</b> | <b>18</b> | <b>33.3</b>    |
| TRAV30                 | 3         | 7.2        | -         | -              | TRAV30                  | 3         | 7.0        | -         | -              |
| <b>TRAV8.4</b>         | <b>4</b>  | <b>5.3</b> | <b>26</b> | <b>48.1</b>    | TRAV8.4                 | 4         | 6.2        | 6         | 11.1           |
| TRAV29/DV5             | 5         | 3.8        | 2         | 3.7            | TRAV13.1                | 5         | 4.6        | -         | -              |
| TRAV2                  | 6         | 3.5        | 1         | 1.9            | TRAV29/DV5              | 6         | 3.8        | 3         | 5.6            |
| TRAV6                  | 7         | 3.2        | 2         | 3.7            | TRAV6                   | 7         | 2.8        | -         | -              |
| TRAV24                 | 8         | 3.1        | 9         | 16.7           | TRAV25                  | 8         | 2.7        | -         | -              |
| TRAV13.1               | 9         | 2.8        | -         | -              | TRAV24                  | 9         | 2.7        | 2         | 3.7            |
| TRAV25                 | 10        | 2.8        | -         | -              | TRAV39                  | 10        | 2.5        | -         | -              |
| <b>TRAV38.1</b>        | <b>11</b> | <b>2.3</b> | <b>19</b> | <b>35.2</b>    | TRAV38.2/DV8            | 11        | 2.2        | 1         | 1.9            |
| TRAV39                 | 12        | 2.1        | 1         | 1.9            | TRAV26.1                | 12        | 2.2        | -         | -              |
| <b>TRAV38.2/DV8</b>    | <b>13</b> | <b>2.0</b> | <b>43</b> | <b>79.6</b>    | TRAV17                  | 13        | 2.2        | 1         | 1.9            |
| TRAV17                 | 14        | 2.0        | 8         | 14.8           | TRAV2                   | 14        | 2.2        | -         | -              |
| TRAV9.1                | 15        | 1.8        | 1         | 1.9            | TRAV38.1                | 15        | 2.1        | -         | -              |
| TRAV26.1               | 16        | 1.7        | -         | -              | TRAV9.1                 | 16        | 2.0        | -         | -              |
| TRAV20                 | 17        | 1.2        | 3         | 5.6            | TRAV18                  | 17        | 1.4        | -         | -              |
| TRAV8.1                | 18        | 1.2        | 2         | 3.7            | TRAV10                  | 18        | 1.4        | -         | -              |
| TRAV18                 | 19        | 1.2        | -         | -              | TRAV20                  | 19        | 1.4        | 1         | 1.9            |
| TRAV40                 | 20        | 0.9        | 12        | 22.2           | TRAV27                  | 20        | 1.2        | -         | -              |
| TRAV26.2               | 21        | 0.9        | 2         | 3.7            | TRAV26.2                | 21        | 1.0        | -         | -              |
| TRAV27                 | 22        | 0.9        | 3         | 5.6            | TRAV40                  | 22        | 0.8        | 1         | 1.9            |
| TRAV10                 | 23        | 0.8        | 6         | 11.1           | TRAV8.1                 | 23        | 0.7        | 1         | 1.9            |
| TRAV35                 | 24        | 0.7        | 5         | 9.3            | TRAV11                  | 24        | 0.6        | -         | -              |
| TRAV3                  | 25        | 0.6        | 2         | 3.7            | TRAV35                  | 25        | 0.6        | 1         | 1.9            |
| TRAV11                 | 26        | 0.5        | -         | -              | TRAV3                   | 26        | 0.6        | -         | -              |
| TRAV14/DV4             | 27        | 0.5        | 3         | 5.6            | TRAV1.1                 | 27        | 0.5        | -         | -              |
| TRAV1.1                | 28        | 0.5        | 3         | 5.6            | TRAV13.2                | 28        | 0.4        | -         | -              |
| TRAV22                 | 29        | 0.3        | 10        | 18.5           | TRAV15                  | 29        | 0.4        | -         | -              |
| TRAV15                 | 30        | 0.3        | -         | -              | TRAV41                  | 30        | 0.4        | -         | -              |
| TRAV13.2               | 31        | 0.3        | 1         | 1.9            | TRAV33                  | 31        | 0.4        | -         | -              |
| TRAV33                 | 32        | 0.3        | -         | -              | TRAV8.5                 | 32        | 0.4        | -         | -              |
| TRAV41                 | 33        | 0.3        | 9         | 16.7           | TRAV5                   | 33        | 0.4        | -         | -              |
| TRAV5                  | 34        | 0.3        | 1         | 1.9            | TRAV14/DV4              | 34        | 0.4        | -         | -              |
| <b>TRAV12.1</b>        | <b>35</b> | <b>0.3</b> | <b>16</b> | <b>29.6</b>    | TRAV22                  | 35        | 0.3        | 1         | 1.9            |
| TRAV8.5                | 36        | 0.3        | -         | -              | TRAV19                  | 36        | 0.3        | -         | -              |
| TRAV19                 | 37        | 0.3        | 4         | 7.4            | TRAV12.1                | 37        | 0.3        | 1         | 1.9            |

|            |    |     |   |     |            |    |     |   |     |
|------------|----|-----|---|-----|------------|----|-----|---|-----|
| TRAV12.3   | 38 | 0.2 | 2 | 3.7 | TRAV12.2   | 38 | 0.3 | 1 | 1.9 |
| TRAV34     | 39 | 0.2 | 1 | 1.9 | TRAV12.3   | 39 | 0.3 | - | -   |
| TRAV12.2   | 40 | 0.2 | - | -   | TRAV8.3    | 40 | 0.2 | - | -   |
| TRAV4      | 41 | 0.2 | - | -   | TRAV34     | 41 | 0.2 | - | -   |
| TRAV37     | 42 | 0.2 | - | -   | TRAV37     | 42 | 0.2 | 1 | 1.9 |
| TRAV8.3    | 43 | 0.2 | - | -   | TRAV4      | 43 | 0.2 | - | -   |
| TRAV8.7    | 44 | 0.1 | - | -   | TRAV28     | 44 | 0.2 | - | -   |
| TRAV28     | 45 | 0.1 | - | -   | TRAV8.7    | 45 | 0.2 | - | -   |
| TRAV7      | 46 | 0.1 | - | -   | TRAV16     | 46 | 0.1 | - | -   |
| TRAV8.6    | 47 | 0.1 | 1 | 1.9 | TRAV7      | 47 | 0.1 | - | -   |
| TRAV16     | 48 | 0.1 | - | -   | TRAV8.6    | 48 | 0.1 | - | -   |
| TRAV36/DV7 | 49 | 0.1 | 1 | 1.9 | TRAV36/DV7 | 49 | 0.1 | - | -   |
| TRAV31     | 50 | 0.1 | - | -   | TRAV21     | 50 | 0.1 | - | -   |
| TRAV21     | 51 | 0.0 | - | -   | TRAV31     | 51 | 0.1 | - | -   |
| TRAV9.2    | 52 | 0.0 | - | -   | TRAV9.2    | 52 | 0.0 | - | -   |
| TRAV1.2    | 53 | 0.0 | - | -   | TRAV1.2    | 53 | 0.0 | - | -   |
| TRAV32     | 54 | 0.0 | - | -   | TRAV32     | 54 | 0.0 | - | -   |

- 10 Rank represent the percentage order of TCR V $\alpha$  segments from the highest to lowest in naïve CD4<sup>+</sup> T  
11 cells of Healthy controls.
- 12 Abbreviations: HC: healthy control; #: count of V-J pairs with significantly different percentage paired  
13 with single type V $\alpha$ ; %<sup>a</sup>: the coverage of V-J pair which paired with corresponding V $\alpha$  segment.
